# Supplementary material for: Sound strategy: acoustic aposematism in the bat–tiger moth arms race
Source: Springer Nature journal article supplement (doi:10.1007/s00114-005-0611-7), 2005-03-16
Supplement: 114_2005_611_ESM_table_1.pdf [file 114_2005_611_ESM_table_1.pdf]

Table 1. Comparison of the signs of the slopes of the *a-priori* predictions and the empirical results.

|                                  | <i>a priori</i> predictions |         |          | Empirical results                 |
|----------------------------------|-----------------------------|---------|----------|-----------------------------------|
|                                  | Aposematism                 | Jamming | Startle  |                                   |
| Multispecies C+S+                | negative                    | zero    | positive | $m = -4.85, R^2 = 0.63, p < 0.05$ |
| Multispecies C+S-                | zero                        | zero    | zero     | $m = 0.00, R^2 = 0.00, p > 0.05$  |
| Multispecies C-S+                | zero                        | zero    | positive | $m = 3.89, R^2 = 0.32, p > 0.05$  |
| Multispecies C-S-                | zero                        | zero    | zero     | $m = 0.00, R^2 = 0.00, p > 0.05$  |
| Single Species C+S+              | negative                    | zero    | positive | $m = -9.05, R^2 = 0.70, p < 0.05$ |
| Single Species C-S-              | zero                        | zero    | zero     | $m = 0.00, R^2 = 0.00, p > 0.05$  |
| Multinomial<br>Probability $p =$ | 0.0014                      | 0.0051  | 0.0274   |                                   |
